# Supplementary material
Source: PubMed Central journal article supplement (PMC4272729)
Supplement: AEM.02483-14_zam999105922so1.pdf [file AEM.02483-14_zam999105922so1.pdf]

## Supplemental Material

### Marine cyanophages demonstrate biogeographic patterns throughout the global ocean

Sijun Huang<sup>#</sup>, Si Zhang, Nianzhi Jiao, Feng Chen<sup>#</sup>

<sup>#</sup> Address correspondence to SH, E-mail: [huangsijun@scsio.ac.cn](mailto:huangsijun@scsio.ac.cn) or FC, E-mail: [chenf@umces.edu](mailto:chenf@umces.edu)

Table S1. Summary of marine cyanopodovirus and cyanomyovirus genomes tested in this study.

| Group          | Phage   | Original host                  | Genome size (bp) | %G+C  | Accession | Publication |
|----------------|---------|--------------------------------|------------------|-------|-----------|-------------|
| Cyanopodovirus |         |                                |                  |       |           |             |
|                | P-RSP2  | <i>Prochlorococcus</i> MIT9302 | 42257            | 34.0% | HQ332139  | (1)         |
| MPP-A          | P60     | <i>Synechococcus</i> WH7805    | 46675            | 53.3% | AF338467  | (2)         |
|                | Syn5    | <i>Synechococcus</i> WH8019    | 46214            | 55.0% | EF372997  | (3)         |
|                | P-SSP9  | <i>Prochlorococcus</i> SS120   | 46997            | 40.5% | HQ316584  | (1)         |
|                | S-CBP2  | <i>Synechococcus</i> CB0208    | 46237            | 55.0% | KC310806  | unpublished |
|                | S-CBP42 | <i>Synechococcus</i> WH7803    | 45218            | 54.6% | KC310805  | unpublished |
| MPP-B          | P-SSP7  | <i>Prochlorococcus</i> MED4    | 44970            | 38.8% | AY939843  | (4)         |
|                | P-SSP5  | <i>Prochlorococcus</i> MIT9515 | 47055            | 39.2% | GU071100  | unpublished |
|                | P-RSP5  | <i>Prochlorococcus</i> NATL1A  | 47741            | 38.7% | GU071102  | (1)         |
|                | P-HP1   | <i>Prochlorococcus</i> NATL2A  | 47536            | 39.9% | GU071104  | (1)         |
|                | P-SSP2  | <i>Prochlorococcus</i> MIT9312 | 45890            | 37.9% | GU071107  | (1)         |
|                | P-GSP1  | <i>Prochlorococcus</i> MED4    | 44945            | 39.6% | HQ332140  | (1)         |
|                | P-SSP3  | <i>Prochlorococcus</i> MIT9312 | 46198            | 37.9% | HQ332137  | (1)         |
|                | P-SSP10 | <i>Prochlorococcus</i> NATL2A  | 47325            | 39.2% | HQ337022  | (1)         |
|                | P-SSP11 | <i>Prochlorococcus</i> MIT9515 | 47039            | 39.2% | HQ634152  | (1)         |
|                | S-CBP1  | <i>Synechococcus</i> CB0101    | 46547            | 47.6% | KC310802  | unpublished |
|                | S-CBP3  | <i>Synechococcus</i> CB0101    | 45871            | 47.0% | KC310803  | unpublished |
|                | S-CBP4  | <i>Synechococcus</i> CB0101    | 44147            | 44.4% | KC310804  | unpublished |
|                | S-RIP1  | <i>Synechococcus</i> WH8101    | 44892            | 42.9% | HQ317388  | unpublished |
|                | S-RIP2  | <i>Synechococcus</i> WH7803    | 45728            | 47.3% | HQ317389  | unpublished |
| Cyanomyovirus  |         |                                |                  |       |           |             |
| I              | S-PM2   | <i>Synechococcus</i> WH7803    | 196280           | 37.8% | AJ630128  | (5)         |
|                | S-RSM4  | <i>Synechococcus</i> WH7803    | 194454           | 41.0% | NC_013085 | (6)         |
|                | Syn1    | <i>Synechococcus</i> WH8101    | 191195           | 41.0% | NC_015288 | (7)         |
| II             | P-SSM2  | <i>Prochlorococcus</i> NATL1A  | 252401           | 35.5% | NC_006883 | (4)         |
|                | P-SSM5  | <i>Prochlorococcus</i> NATL2A  | 252013           | 35.5% | HQ632825  | (8)         |

|      |                             |                                 |        |           |           |     |
|------|-----------------------------|---------------------------------|--------|-----------|-----------|-----|
|      | S-SM2                       | <i>Synechococcus</i> WH8017     | 190789 | 40.0%     | NC_015279 | (7) |
|      | S-SSM7                      | <i>Synechococcus</i> WH8109     | 232878 | 39.0%     | NC_015287 | (7) |
| III  | P-RSM1                      | <i>Prochlorococcus</i> MIT 9303 | 177211 | 40.2%     | HQ634175  | (8) |
|      | P-RSM3                      | <i>Prochlorococcus</i> NATL2A   | 178750 | 36.7%     | HQ634176  | (8) |
|      | P-RSM4                      | <i>Prochlorococcus</i> MIT 9303 | 176428 | 38.0%     | NC_015283 | (7) |
|      | P-RSM6                      | <i>Prochlorococcus</i> NATL2A   | 192497 | 39.3%     | HQ634193  | (8) |
|      | P-SSM3                      | <i>Prochlorococcus</i> NATL2A   | 179063 | 36.7%     | HQ337021  | (8) |
|      | P-SSM4                      | <i>Prochlorococcus</i> NATL2A   | 178249 | 36.7%     | NC_006884 | (4) |
|      | P-SSM7                      | <i>Prochlorococcus</i> NATL1A   | 182180 | 37.0%     | NC_015290 | (7) |
|      | S-ShM2                      | <i>Synechococcus</i> WH8102     | 179563 | 41.0%     | NC_015281 | (7) |
|      | S-SM1                       | <i>Synechococcus</i> WH6501     | 174079 | 41.0%     | NC_015282 | (7) |
|      | S-SSM2                      | <i>Synechococcus</i> WH8102     | 179980 | 41.1%     | JF974292  | (8) |
|      | S-SSM4                      | <i>Synechococcus</i> WH8018     | 182801 | 39.4%     | HQ316583  | (8) |
|      | S-SSM5                      | <i>Synechococcus</i> WH8102     | 176184 | 40.0%     | NC_015289 | (7) |
|      | Syn10                       | <i>Synechococcus</i> WH8017     | 177103 | 40.6%     | HQ634191  | (8) |
|      | Syn19                       | <i>Synechococcus</i> WH8109     | 175230 | 41.0%     | NC_015286 | (7) |
|      | Syn2                        | <i>Synechococcus</i> WH8012     | 175596 | 41.3%     | HQ634190  | (8) |
|      | Syn30                       | <i>Synechococcus</i> WH7803     | 178807 | 39.9%     | HQ634189  | (8) |
|      | Syn33                       | <i>Synechococcus</i> WH7803     | 174285 | 40.0%     | NC_015285 | (7) |
| Syn9 | <i>Synechococcus</i> WH8012 | 177300                          | 40.5%  | NC_008296 | (9)       |     |
| IV   | MED4-213                    | <i>Prochlorococcus</i> MED4     | 180977 | 37.8%     | HQ634174  | (8) |
|      | P-HM1                       | <i>Prochlorococcus</i> MED4     | 181044 | 38.0%     | NC_015280 | (7) |
|      | P-HM2                       | <i>Prochlorococcus</i> MED4     | 183806 | 38.0%     | NC_015284 | (7) |

Table S2. Information of metagenomes tested in this study.

| Metagenome project          | ID of sample tested in this study                                                                                                                                                                                                                                                                                                                                                                                                                                                                                     | Latitude & Longitude                               | Number of reads | Size fraction (µm) | Sampling region           | Habitat                                                                                 | Collection date | Reference | Accession number at CAMERA |
|-----------------------------|-----------------------------------------------------------------------------------------------------------------------------------------------------------------------------------------------------------------------------------------------------------------------------------------------------------------------------------------------------------------------------------------------------------------------------------------------------------------------------------------------------------------------|----------------------------------------------------|-----------------|--------------------|---------------------------|-----------------------------------------------------------------------------------------|-----------------|-----------|----------------------------|
| Global Ocean Sampling (GOS) | GS000a, GS000b, GS000c, GS000d, GS001a, GS001b, GS001c, GS002, GS003, GS004, GS006, GS007, GS008, GS009, GS010, GS011, GS012, GS013, GS014, GS015, GS016, GS017, GS018, GS019, GS021, GS022, GS023, GS025, GS026, GS027, GS028, GS029, GS031, GS034, GS035, GS036, GS037, GS040, GS042, GS043, GS047, GS048a, GS048b, GS049, GS050, GS051, GS108, GS108a, GS108b, GS109, GS110a, GS110b, GS111, GS112, GS112a, GS112b, GS113, GS114, GS115, GS116, GS117a, GS117b, GS119, GS120, GS121, GS122a, GS122b, GS123, GS148. | Global                                             | 10,999,635      | 0.1-0.8 (mostly)   | Global oceans             | Many typical marine environments, including estuary, coastal water, open ocean and reef | 2004-2005       | (10, 11)  | CAM_PROJ_GOS               |
| HOT                         | HF_SMPL_HOT179_125M_SG<br>HF_SMPL_HOT179_25M_SG<br>HF_SMPL_HOT179_75M_SG<br>JGI_SMPL_HF10_10-07-02<br>JGI_SMPL_HF130_10-06-02<br>JGI_SMPL_HF200_10-06-02<br>JGI_SMPL_HF70_10-07-02                                                                                                                                                                                                                                                                                                                                    | 22.75N,<br>158.00W                                 | 477,879         | 0.22 - 1.6         | Pacific gyre, HOT station | Open ocean                                                                              | 2002-2006       | (12-14)   | CAM_PROJ_HOT               |
| MarineVirome                | SCUMS_SMPL_BBC                                                                                                                                                                                                                                                                                                                                                                                                                                                                                                        | 49.705N,<br>124.35167W                             | 416,456         | 0-0.2              | Bay of British Columbia   | Coastal water                                                                           | 1996-2004       | (15)      | CAM_PROJ_MarineVirome      |
|                             | SCUMS_SMPL_SAR                                                                                                                                                                                                                                                                                                                                                                                                                                                                                                        | 32.166668N,<br>64.5W                               | 399,343         | 0-0.2              | Sargasso Sea              | Open ocean                                                                              | Jun-2005        |           |                            |
|                             | SCUMS_SMPL_GOM                                                                                                                                                                                                                                                                                                                                                                                                                                                                                                        | 28.258333N,<br>87.67333W<br>26.205N,<br>93.941666W | 263,908         | 0-0.2              | Gulf of Mexico            | Oceanic water                                                                           | 1996-2001       |           |                            |

|            |                                                                                                                                   |                                                                          |           |       |                                 |               |              |      |                     |
|------------|-----------------------------------------------------------------------------------------------------------------------------------|--------------------------------------------------------------------------|-----------|-------|---------------------------------|---------------|--------------|------|---------------------|
|            |                                                                                                                                   | 27.615N,<br>96.81167W<br>25.895N,<br>85.18W                              |           |       |                                 |               |              |      |                     |
|            | SCUMS_SMPL_Arctic                                                                                                                 | 70.69334N,<br>136.42334W<br>73.16167N,<br>159.44667W                     | 688,590   | 0-0.2 | Arctic<br>Ocean                 | Coastal water | Sep-Oct-2002 |      |                     |
| BroadPhage | CAM_SMPL_000966<br>CAM_SMPL_000994<br>CAM_SMPL_000995<br>CAM_SMPL_001000                                                          | 38.967N,<br>76.378W                                                      | 752,938   | 0-0.2 | Chesapeake<br>Bay               | Estuary       | 30-Jul-2007  |      | CAM_PROJ_BroadPhage |
|            | CAM_SMPL_000722<br>CAM_SMPL_000723<br>CAM_SMPL_000724<br>CAM_SMPL_000725<br>CAM_SMPL_000726<br>CAM_SMPL_000727                    | 32.867N,<br>117.257W                                                     | 947,196   | 0-0.2 | Scripps pier                    | Coastal water | 7-Apr-2009   | (16) |                     |
|            | CAM_SMPL_000801<br>CAM_SMPL_000816<br>CAM_SMPL_000823<br>CAM_SMPL_000837                                                          | 22.75N,<br>158.00W                                                       | 985,754   | 0-0.2 | Pacific gyre<br>HOT station     | Open ocean    | 11-Mar-2010  |      |                     |
|            | CAM_SMPL_000961<br>CAM_SMPL_000990                                                                                                | 33.55N,<br>118.4W                                                        | 519,987   | 0-0.2 | Southern<br>California<br>Bight | Coastal water | 9-Aug-2009   |      |                     |
|            | CAM_SMPL_000972<br>CAM_SMPL_001015                                                                                                | 54.1873N,<br>7.8964E                                                     | 690,747   | 0-0.2 | Helgoland,<br>North Sea         | Coastal water | 14-Apr-2009  |      |                     |
|            | CAM_SMPL_000999<br>CAM_SMPL_000987<br>CAM_SMPL_000959<br>CAM_SMPL_000980<br>CAM_SMPL_000958<br>CAM_SMPL_000988<br>CAM_SMPL_001013 | 45.00018S,<br>61.29991W<br>49.45S,<br>60.2825W<br>52.3638S,<br>60.16867W | 1,361,811 | 0-0.2 | Argentine<br>Sea                | Coastal water | 30-Dec-2008  |      |                     |
|            | CAM_SMPL_001011                                                                                                                   | 50.00N,<br>145.00W                                                       | 325,857   | 0-0.2 | Subarctic<br>open ocean         | Open ocean    | 9-Jun-2009   | (17) |                     |
|            | CAM_SMPL_000806                                                                                                                   | 27.7737N,<br>82.6215W                                                    | 202,505   | 0-0.2 | Tampa Bay                       | Estuary       | 4-Mar-2009   |      |                     |

Note: For the BroadPhage and HOT projects, only samples collected from euphotic zone were tested in this study.

Table S3. Information of the six single-copy housekeeping genes of *Prochlorococcus* and marine *Synechococcus* genomes (N = 27) tested as reference sequences in metagenomic read recruitment.

| Clade               | Strain                                  | Max. identity to other clade (%) <sup>a</sup> |             |             |             |            |             | Accession    | Publication |
|---------------------|-----------------------------------------|-----------------------------------------------|-------------|-------------|-------------|------------|-------------|--------------|-------------|
|                     |                                         | <i>recA</i>                                   | <i>atpD</i> | <i>gyrB</i> | <i>rpoB</i> | <i>tuf</i> | <i>nrdJ</i> |              |             |
| HLI                 | <i>Prochlorococcus marinus</i> MED4     | 88                                            | 84          | 83          | 84          | 87         | 83          | BX548174     | (18)        |
| HLI                 | <i>Prochlorococcus marinus</i> MIT 9515 | 85                                            | 85          | 82          | 84          | 87         | 83          | CP000552     | (19)        |
| HLII                | <i>Prochlorococcus marinus</i> AS9601   | 87                                            | 84          | 83          | 84          | 87         | 83          | CP000551     | (19)        |
| HLII                | <i>Prochlorococcus marinus</i> MIT 9215 | 86                                            | 84          | 82          | 83          | 86         | 83          | CP000825     | (19)        |
| HLII                | <i>Prochlorococcus marinus</i> MIT 9301 | 88                                            | 85          | 83          | 84          | 87         | 83          | CP000576     | (19)        |
| HLII                | <i>Prochlorococcus marinus</i> MIT 9312 | 87                                            | 83          | 84          | 84          | 87         | 83          | CP000111     | (20)        |
| LLI                 | <i>Prochlorococcus marinus</i> NATL1A   | 80                                            | 79          | 81          | 80          | 82         | 82          | CP000553     | (19)        |
| LLI                 | <i>Prochlorococcus marinus</i> NATL2A   | 79                                            | 79          | 81          | 80          | 82         | 82          | CP000095     | (19)        |
| LLII                | <i>Prochlorococcus marinus</i> SS120    | 82                                            | 81          | 81          | 81          | 82         | 85          | AE017126     | (21)        |
| LLIII               | <i>Prochlorococcus marinus</i> MIT 9211 | 82                                            | 81          | 81          | 81          | 82         | 85          | CP000878     | (19)        |
| LLIV                | <i>Prochlorococcus marinus</i> MIT 9303 | 82                                            | 83          | 79          | 81          | 83         | 82          | CP000554     | (19)        |
| LLIV                | <i>Prochlorococcus marinus</i> MIT 9313 | 81                                            | 82          | 79          | 81          | 84         | 82          | BX548175     | (18)        |
| Subcluster 5.1-I    | <i>Synechococcus</i> sp. CC9311         | 82                                            | 83          | 82          | 82          | 88         | 77          | CP000435     | (22)        |
| Subcluster 5.1-I    | <i>Synechococcus</i> sp. WH 8016        | 81                                            | 85          | 82          | 82          | 88         | 80          | AGIK00000000 | unpublished |
| Subcluster 5.1-II   | <i>Synechococcus</i> sp. CC9605         | 84                                            | 90          | 85          | 89          | 94         | 83          | CP000110     | (23)        |
| Subcluster 5.1-II   | <i>Synechococcus</i> sp. WH 8109        | 86                                            | 90          | 85          | 88          | 95         | 83          | CP006882     | unpublished |
| Subcluster 5.1-III  | <i>Synechococcus</i> sp. WH 8102        | 86                                            | 90          | 85          | 89          | 88         | 82          | BX548020     | (24)        |
| Subcluster 5.1-IV   | <i>Synechococcus</i> sp. BL107          | 81                                            | 84          | 81          | 83          | 87         | 80          | AATZ00000000 | (23)        |
| Subcluster 5.1-IV   | <i>Synechococcus</i> sp. CC9902         | 80                                            | 85          | 80          | 83          | 88         | 79          | CP000097     | (23)        |
| Subcluster 5.1-IX   | <i>Synechococcus</i> sp. RS9916         | 85                                            | 89          | 85          | 87          | 95         | 80          | AAUA00000000 | (23)        |
| Subcluster 5.1-V    | <i>Synechococcus</i> sp. WH 7803        | 89                                            | 89          | 88          | 88          | 94         | 86          | CT971583     | (23)        |
| Subcluster 5.1-VI   | <i>Synechococcus</i> sp. WH 7805        | 89                                            | 89          | 88          | 88          | 94         | 86          | AAOK00000000 | (23)        |
| Subcluster 5.1-VIII | <i>Synechococcus</i> sp. RS9917         | 87                                            | 86          | 86          | 87          | 90         | 83          | AANP00000000 | (23)        |
| Subcluster 5.2      | <i>Synechococcus</i> sp. WH 5701        | 87                                            | 86          | 84          | 84          | 87         | 82          | AANO00000000 | (23)        |
| Subcluster 5.2      | <i>Synechococcus</i> sp. CB0101         | 87                                            | 89          | 84          | 87          | 90         | 81          | ADXL01000000 | (25)        |
| Subcluster 5.2      | <i>Synechococcus</i> sp. CB0205         | 84                                            | 89          | 85          | 86          | 91         | 82          | ADXM00000000 | unpublished |
| Subcluster 5.3      | <i>Synechococcus</i> sp. RCC307         | 86                                            | 89          | 82          | 86          | 91         | 80          | CT978603     | (23)        |

|                                                       |      |      |      |      |      |      |  |
|-------------------------------------------------------|------|------|------|------|------|------|--|
| Average of the identities (%) <sup>a</sup>            | 84.5 | 85.3 | 83.0 | 84.3 | 88.0 | 82.2 |  |
| Standard deviation of the identities (%) <sup>a</sup> | 3.0  | 3.4  | 2.4  | 2.8  | 4.1  | 2.0  |  |

<sup>a</sup> A sequence of one of the six single-copy housekeeping genes from a picocyanobacterial strain was compared to the sequences of this gene from strains in the other clades and the maximum identity was then recorded. The data show the maximum identities between sequences from different picocyanobacterial clades.

Figure S1

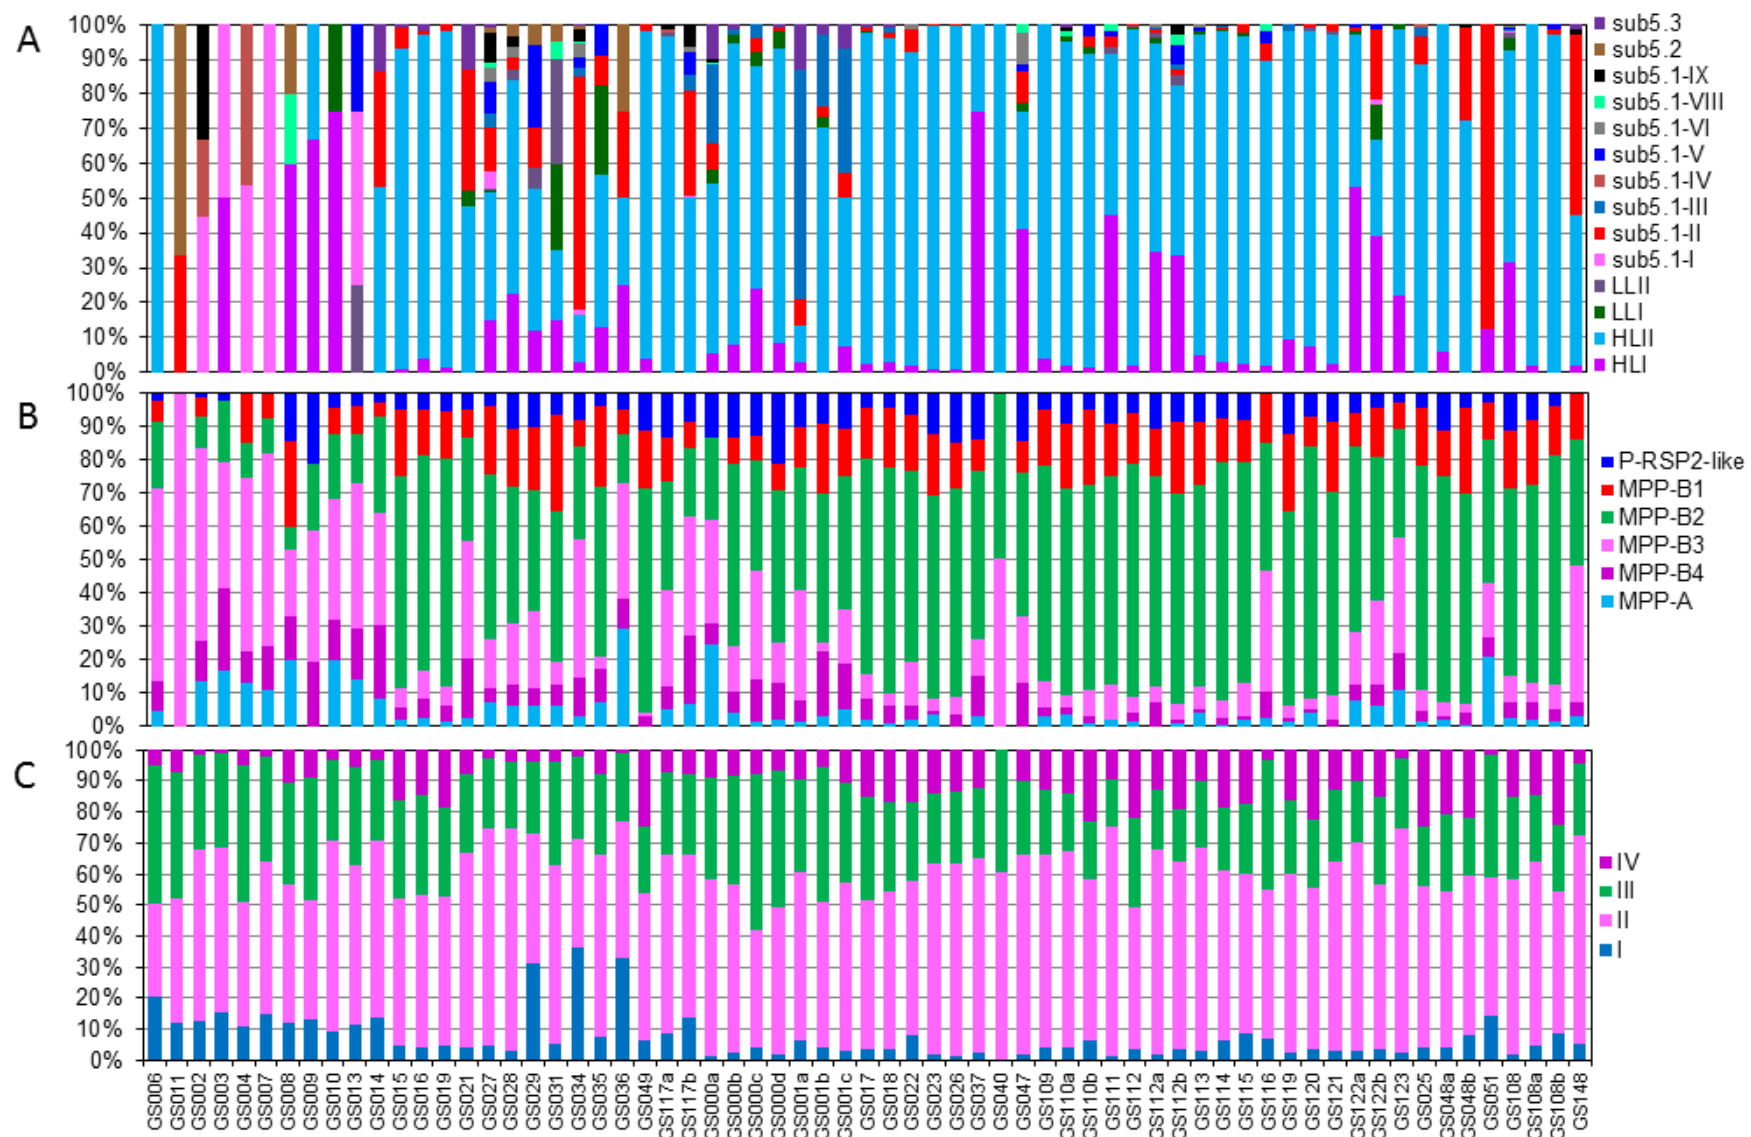



Figure S1. Relative abundances of picocyanobacterial (A), cyanopodovirus (B) and cyanomyovirus (C) genotypes at GOS sampling sites as revealed by metagenomic read recruitment against the GOS database. Four *Prochlorococcus* genotypes and 10 *Synechococcus* genotypes were found in the GOS database in this study. “sub5.1-I” stands for *Synechococcus* genotype Clade I in Marine Subcluster 5.1, and other terms follow the same naming rule.

## Reference

1. **Labrie S, Frois - Moniz K, Osburne M, Kelly L, Roggensack S, Sullivan M, Gearin G, Zeng Q, Fitzgerald M, Henn M.** 2013. Genomes of marine cyanopodoviruses reveal multiple origins of diversity. *Environ. Microbiol.* **15**:1356-1376.
2. **Chen F, Lu J.** 2002. Genomic sequence and evolution of marine cyanophage P60: a new insight on lytic and lysogenic phages. *Appl. Environ. Microbiol.* **68**:2589-2594.
3. **Pope WH, Weigele PR, Chang J, Pedulla ML, Ford ME, Houtz JM, Jiang W, Chiu W, Hatfull GF, Hendrix RW, King J.** 2007. Genome sequence, structural proteins, and capsid organization of the cyanophage Syn5: a "horned" bacteriophage of marine synechococcus. *J. Mol. Biol.* **368**:966-981.
4. **Sullivan MB, Coleman ML, Weigele P, Rohwer F, Chisholm SW.** 2005. Three *Prochlorococcus* cyanophage genomes: signature features and ecological interpretations. *PLoS Biol.* **3**:e144.
5. **Mann NH, Clokie MR, Millard A, Cook A, Wilson WH, Wheatley PJ, Letarov A, Krisch HM.** 2005. The genome of S-PM2, a "photosynthetic" T4-type bacteriophage that infects marine *Synechococcus* strains. *J. Bacteriol.* **187**:3188-3200.
6. **Millard AD, Zwirgmaier K, Downey MJ, Mann NH, Scanlan DJ.** 2009. Comparative genomics of marine cyanomyoviruses reveals the widespread occurrence of *Synechococcus* host genes localized to a hyperplastic region: implications for mechanisms of cyanophage evolution. *Environ. Microbiol.* **11**:2370-2387.
7. **Sullivan MB, Huang KH, Ignacio-Espinoza JC, Berlin AM, Kelly L, Weigele PR, DeFrancesco AS, Kern SE, Thompson LR, Young S, Yandava C, Fu R, Krastins B, Chase M, Sarracino D, Osburne MS, Henn MR, Chisholm SW.** 2010. Genomic analysis of oceanic cyanobacterial myoviruses compared with T4-like myoviruses from diverse hosts and environments. *Environ. Microbiol.* **12**:3035-3056.
8. **Kelly L, Ding H, Huang KH, Osburne MS, Chisholm SW.** 2013. Genetic diversity in cultured and wild marine cyanomyoviruses reveals phosphorus stress as a strong selective agent. *ISME J.* **7**:1827-1841.
9. **Weigele PR, Pope WH, Pedulla ML, Houtz JM, Smith AL, Conway JF, King J, Hatfull GF, Lawrence JG, Hendrix RW.** 2007. Genomic and structural analysis of Syn9, a cyanophage infecting marine *Prochlorococcus* and *Synechococcus*. *Environ. Microbiol.* **9**:1675-1695.
10. **Rusch DB, Halpern AL, Sutton G, Heidelberg KB, Williamson S, Yooseph S, Wu D, Eisen JA, Hoffman JM, Remington K, Beeson K, Tran B, Smith H, Baden-Tillson H, Stewart C, Thorpe J, Freeman J, Andrews-Pfannkoch C, Venter JE, Li K, Kravitz S, Heidelberg JF, Utterback T, Rogers YH, Falcon LI, Souza V, Bonilla-Rosso G, Eguiarte LE, Karl DM, Sathyendranath S, Platt T, Bermingham E, Gallardo V, Tamayo-Castillo G, Ferrari MR, Strausberg RL, Neilson K, Friedman R, Frazier M, Venter JC.** 2007. The Sorcerer II Global Ocean Sampling expedition: northwest Atlantic through eastern tropical Pacific. *PLoS Biol.* **5**:e77.
11. **Yooseph S, Sutton G, Rusch DB, Halpern AL, Williamson SJ, Remington K, Eisen JA, Heidelberg KB, Manning G, Li W.** 2007. The Sorcerer II Global Ocean Sampling expedition: expanding the universe of protein families. *PLoS Biol.* **5**:e16.
12. **DeLong EF, Preston CM, Mincer T, Rich V, Hallam SJ, Frigaard NU, Martinez A, Sullivan MB, Edwards R, Brito BR, Chisholm SW, Karl DM.** 2006. Community genomics among stratified microbial assemblages in the ocean's interior. *Science* **311**:496-503.
13. **Frias-Lopez J, Shi Y, Tyson GW, Coleman ML, Schuster SC, Chisholm SW, Delong EF.** 2008. Microbial community gene expression in ocean surface waters. *Proc Natl Acad Sci U S A* **105**:3805-3810.
14. **Martinez A, Tyson GW, Delong EF.** 2010. Widespread known and novel phosphonate utilization pathways in marine bacteria revealed by functional

- screening and metagenomic analyses. *Environ. Microbiol.* **12**:222-238.
15. **Angly FE, Felts B, Breitbart M, Salamon P, Edwards RA, Carlson C, Chan AM, Haynes M, Kelley S, Liu H.** 2006. The marine viromes of four oceanic regions. *PLoS Biol.* **4**:e368.
  16. **Hurwitz BL, Deng L, Poulos BT, Sullivan MB.** 2013. Evaluation of methods to concentrate and purify ocean virus communities through comparative, replicated metagenomics. *Environ. Microbiol.* **15**:1428-1440.
  17. **Hurwitz BL, Sullivan MB.** 2013. The Pacific Ocean Virome (POV): a marine viral metagenomic dataset and associated protein clusters for quantitative viral ecology. *PLoS One* **8**:e57355.
  18. **Rocap G, Larimer FW, Lamerdin J, Malfatti S, Chain P, Ahlgren NA, Arellano A, Coleman M, Hauser L, Hess WR, Johnson ZI, Land M, Lindell D, Post AF, Regala W, Shah M, Shaw SL, Steglich C, Sullivan MB, Ting CS, Tolonen A, Webb EA, Zinser ER, Chisholm SW.** 2003. Genome divergence in two *Prochlorococcus* ecotypes reflects oceanic niche differentiation. *Nature* **424**:1042-1047.
  19. **Kettler GC, Martiny AC, Huang K, Zucker J, Coleman ML, Rodrigue S, Chen F, Lapidus A, Ferriera S, Johnson J, Steglich C, Church GM, Richardson P, Chisholm SW.** 2007. Patterns and implications of gene gain and loss in the evolution of *Prochlorococcus*. *PLoS Genet.* **3**:e231.
  20. **Coleman ML, Sullivan MB, Martiny AC, Steglich C, Barry K, Delong EE, Chisholm SW.** 2006. Genomic islands and the ecology and evolution of *Prochlorococcus*. *Science* **311**:1768-1770.
  21. **Dufresne A, Salanoubat M, Partensky F, Artiguenave F, Axmann IM, Barbe V, Duprat S, Galperin MY, Koonin EV, Le Gall F, Makarova KS, Ostrowski M, Oztas S, Robert C, Rogozin IB, Scanlan DJ, Tandeau de Marsac N, Weissenbach J, Wincker P, Wolf YI, Hess WR.** 2003. Genome sequence of the cyanobacterium *Prochlorococcus marinus* SS120, a nearly minimal oxyphototrophic genome. *Proc Natl Acad Sci U S A* **100**:10020-10025.
  22. **Palenik B, Ren Q, Dupont CL, Myers GS, Heidelberg JF, Badger JH, Madupu R, Nelson WC, Brinkac LM, Dodson RJ, Durkin AS, Daugherty SC, Sullivan SA, Khouri H, Mohamoud Y, Halpin R, Paulsen IT.** 2006. Genome sequence of *Synechococcus* CC9311: Insights into adaptation to a coastal environment. *Proc Natl Acad Sci U S A* **103**:13555-13559.
  23. **Dufresne A, Ostrowski M, Scanlan DJ, Garczarek L, Mazard S, Palenik BP, Paulsen IT, de Marsac NT, Wincker P, Dossat C, Ferriera S, Johnson J, Post AF, Hess WR, Partensky F.** 2008. Unraveling the genomic mosaic of a ubiquitous genus of marine cyanobacteria. *Genome Biol* **9**:R90.
  24. **Palenik B, Brahamsha B, Larimer FW, Land M, Hauser L, Chain P, Lamerdin J, Regala W, Allen EE, McCarren J, Paulsen I, Dufresne A, Partensky F, Webb EA, Waterbury J.** 2003. The genome of a motile marine *Synechococcus*. *Nature* **424**:1037-1042.
  25. **Marsan D, Wommack KE, Ravel J, Chen F.** 2014. Draft genome sequence of *Synechococcus* sp. strain CB0101, isolated from the Chesapeake Bay estuary. *Genome announcements* **2**:e01111-01113.
